# Supplementary material for: Toward heteronuclear supramolecular architectures of pyridine-4-thiolate
Source: Royal Society of Chemistry journal article supplement (doi:10.1039/c2ce26367j), 2012-01-01
Supplement: c2ce26367j.pdf [file c2ce26367j.pdf]

# Toward Heteronuclear Supramolecular Architectures of Pyridine-4-thiolate

Biing-Chiau Tzeng,<sup>\*,a</sup> Chau-Shiung Ding,<sup>a</sup> Tsung-Yi Chang,<sup>a</sup> Cho-Chun Hu<sup>\*,b</sup> and Gene-Hsiang Lee,<sup>\*,c</sup>

<sup>a</sup>Department of Chemistry and Biochemistry, National Chung Cheng University, 168 University Rd., Min-Hsiung, Chiayi 62102, Taiwan

<sup>b</sup>Department of Applied Science, National Taitung University, 684, Chunghua Rd., Sec. 1, Taitung 95002, Taiwan

<sup>c</sup>Department of Chemistry, National Taiwan University, 1, Sec. 4, Roosevelt Road, Taipei 10617, Taiwan

## Supporting Information

**Figure S1.** The solution emission spectra of **1-4** (a) at room temperature and (b) at 77K in DMF, and (c) at room temperature and (d) at 77K in acetone. The excitation is at wavelength of 350 nm.

**Figure S2.** Molecular structure of **3** and its ORTEP diagram showing a 50 % probability ellipsoid.

**Figure S3.** The PXRD pattern of **5**.

**Figure S4.** Molecular structure of **7** and its ORTEP diagram showing a 50 % probability ellipsoids.

**Figure S5.** The TGA trace of **3**.

**Figure S6.** The TGA trace of **4**.

**Figure S7.** The solid-state emission spectra of **5** at room temperature (blue) and at 77K (red) with an excitation wavelength of 350 nm.

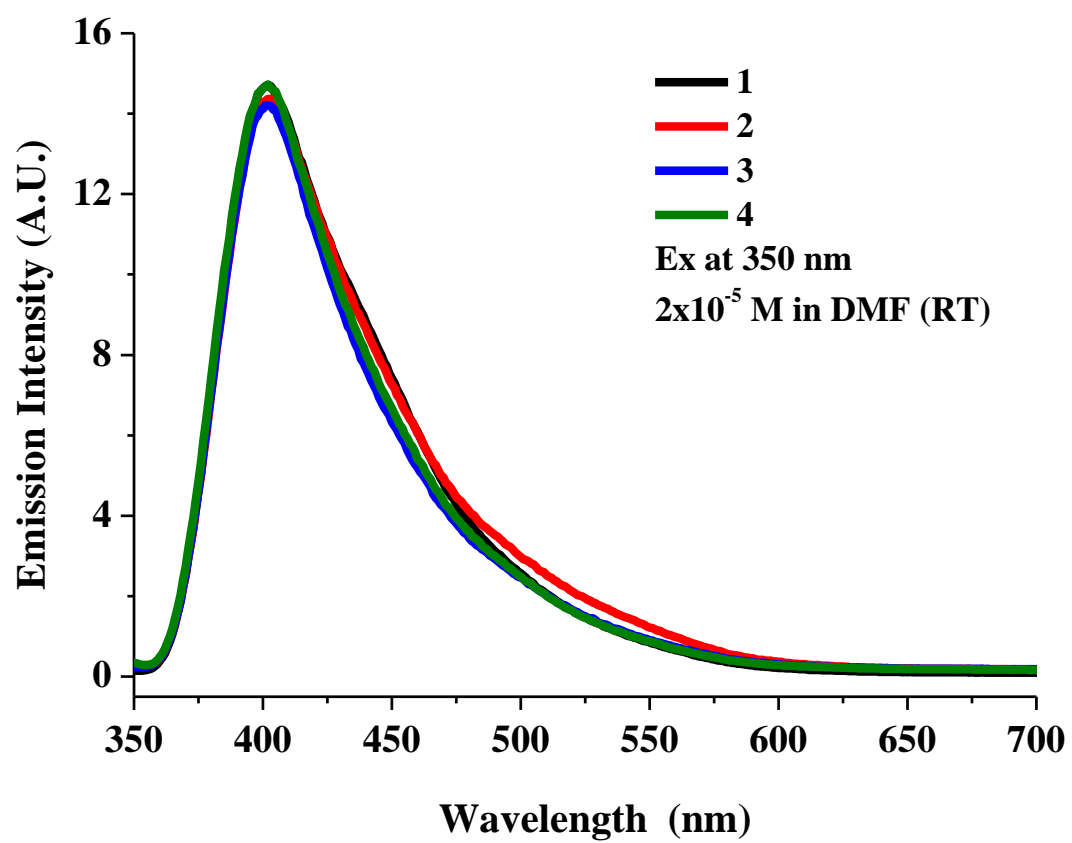

Figure S1(a)

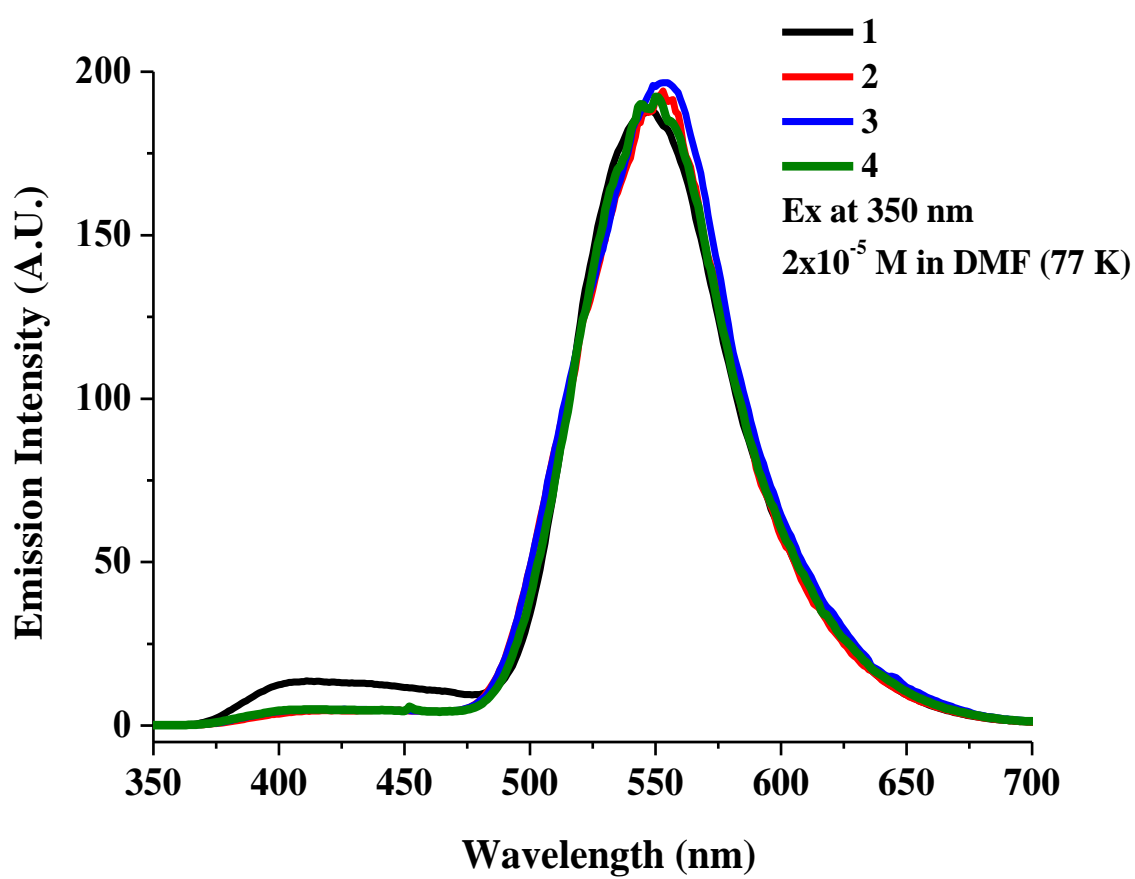

Figure S1(b)

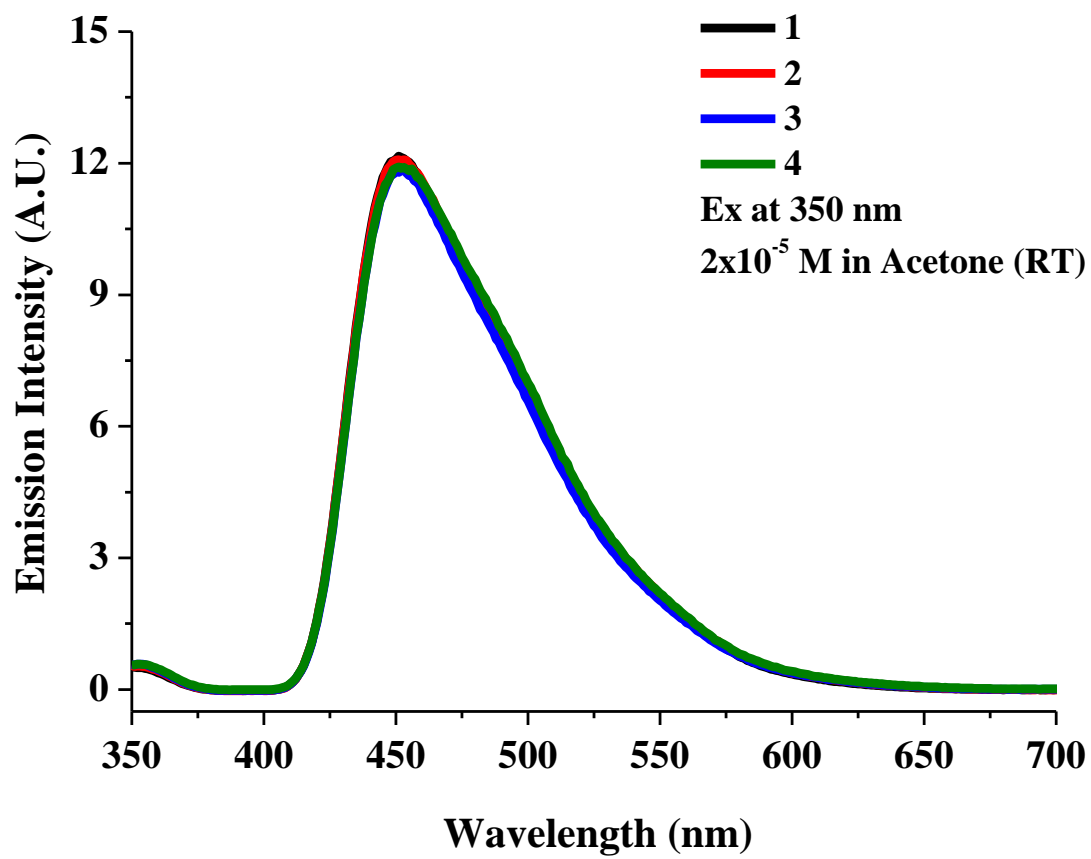

Figure S1(c)

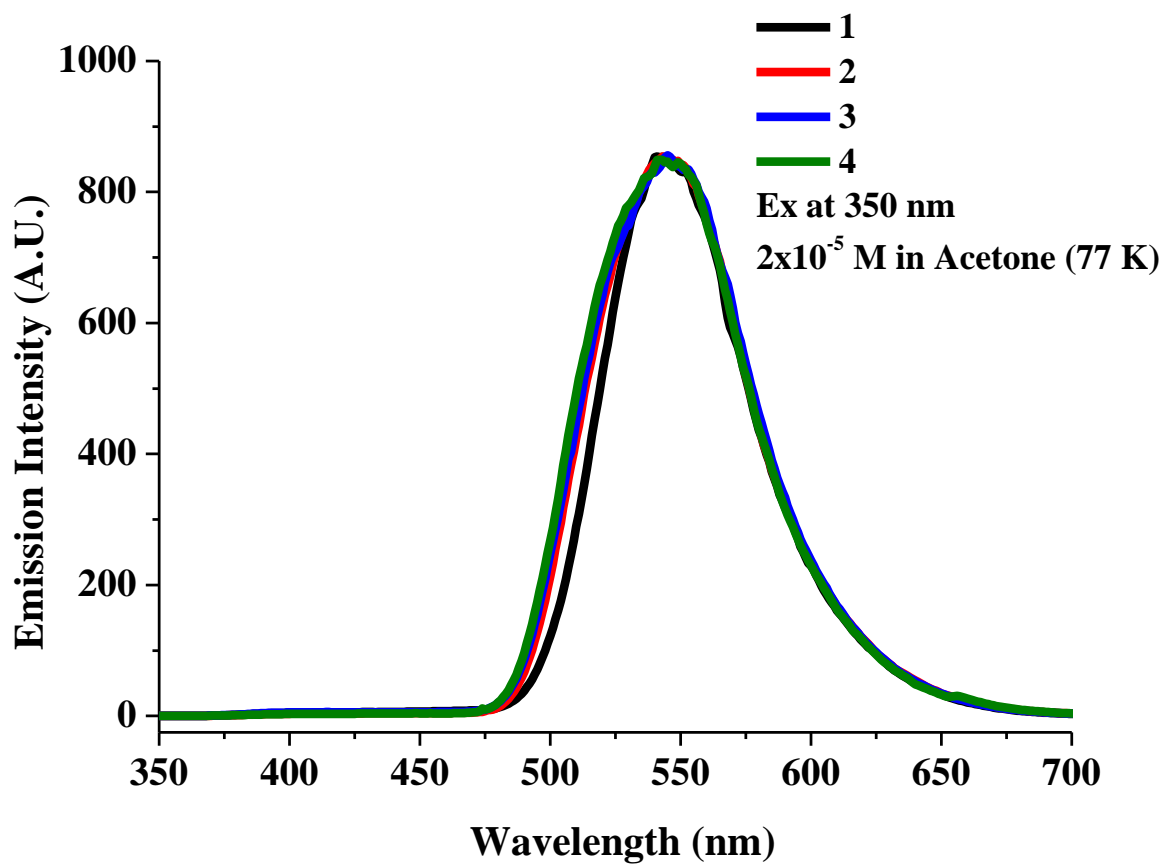

Figure S1(d)

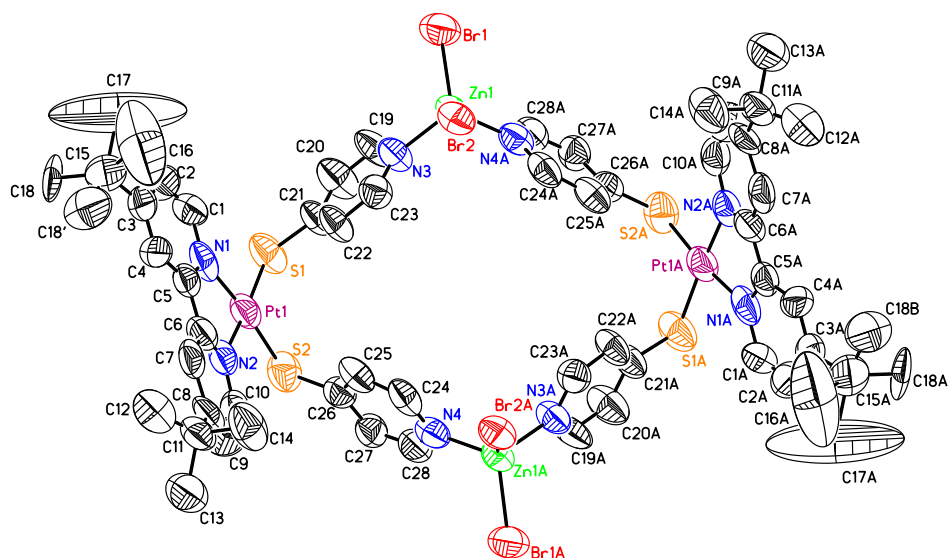

Figure S2

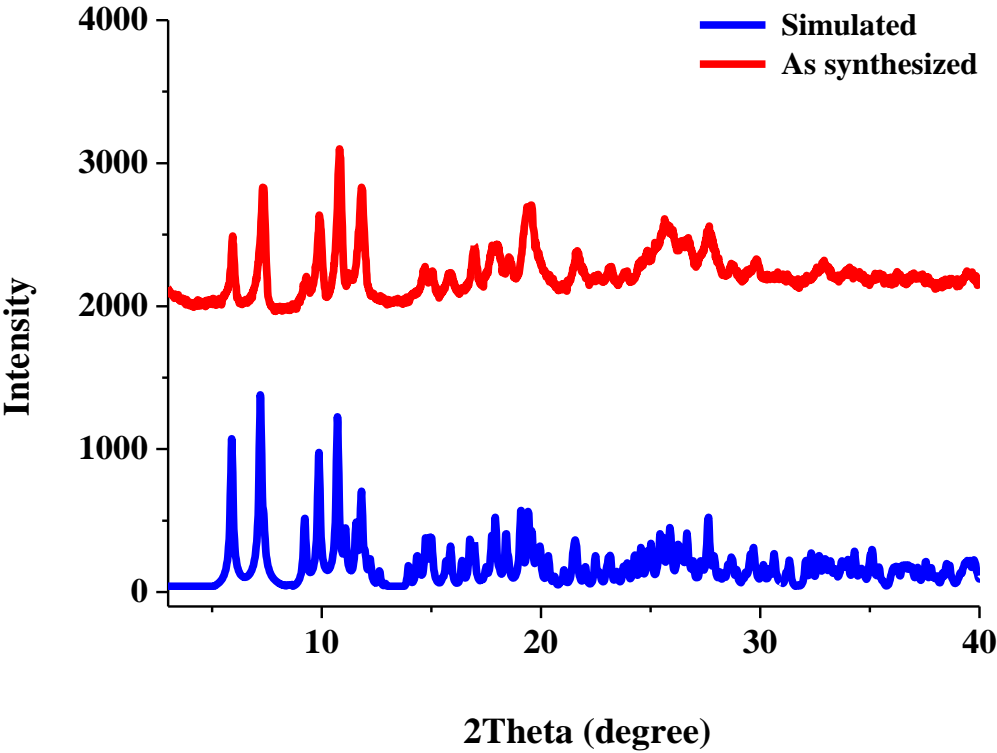

Figure S3

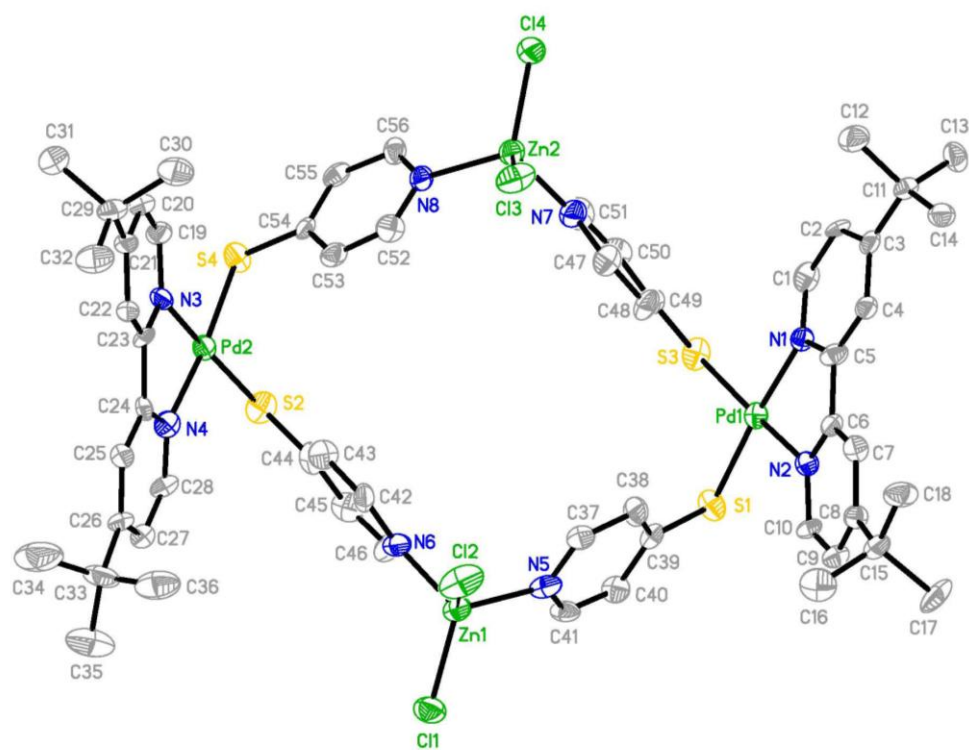

Figure S4



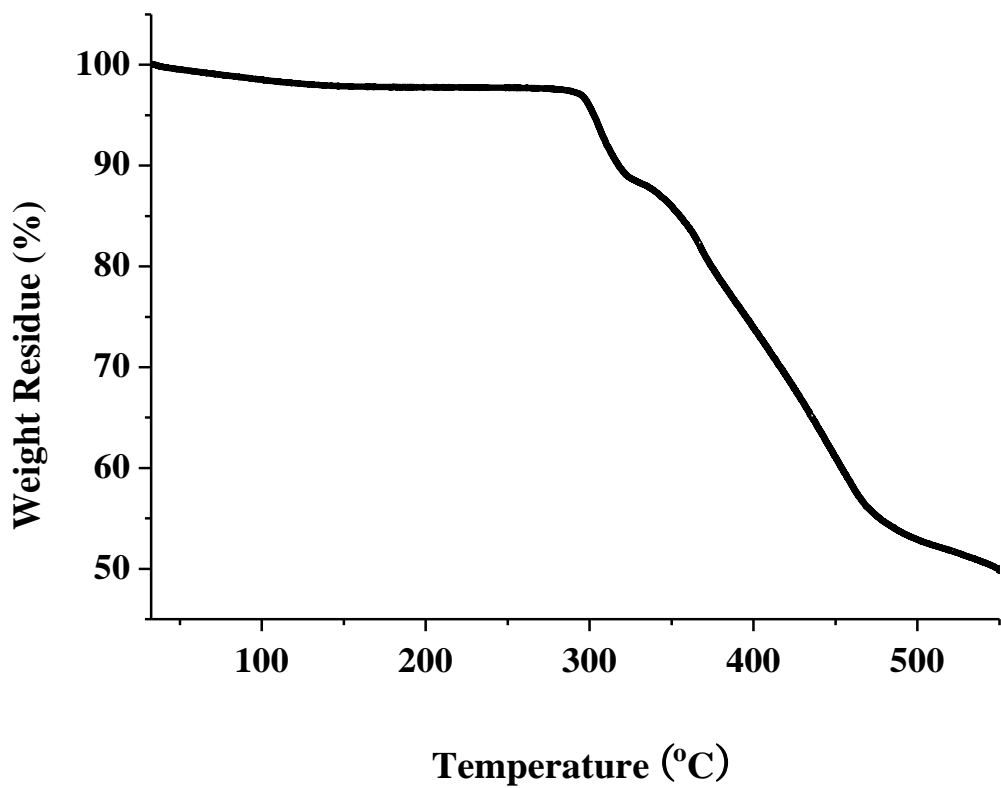

Figure S5

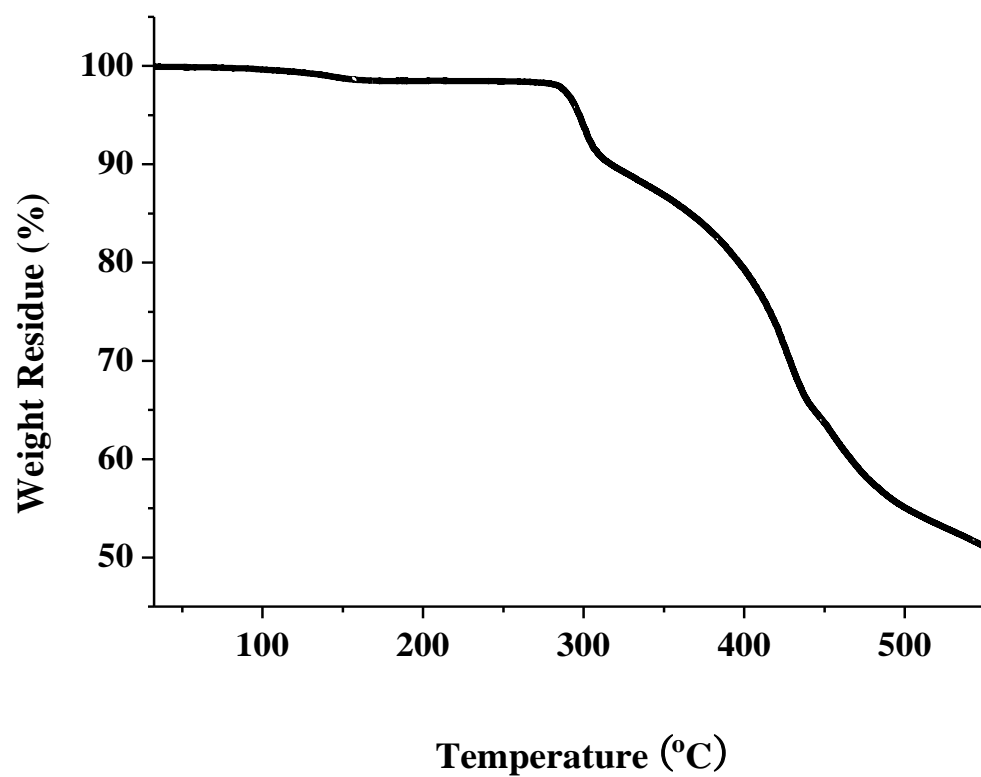

Figure S6

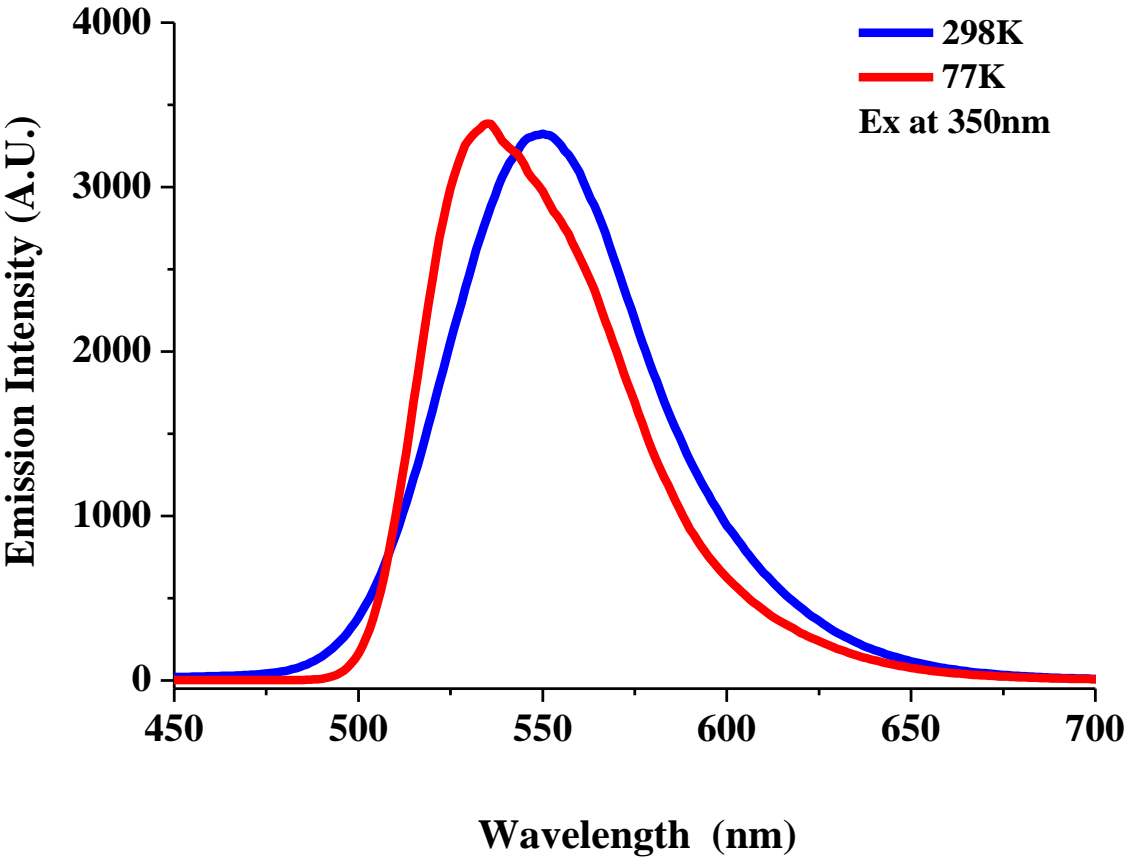

Figure S7
